# Supplementary material
Source: PubMed Central journal article supplement (PMC4560067)
Supplement: supp_ddv142_ddv142supp.pdf [file supp_ddv142_ddv142supp.pdf]

Supplementary Figure S1. Pearson correlation between each pair of gene features.

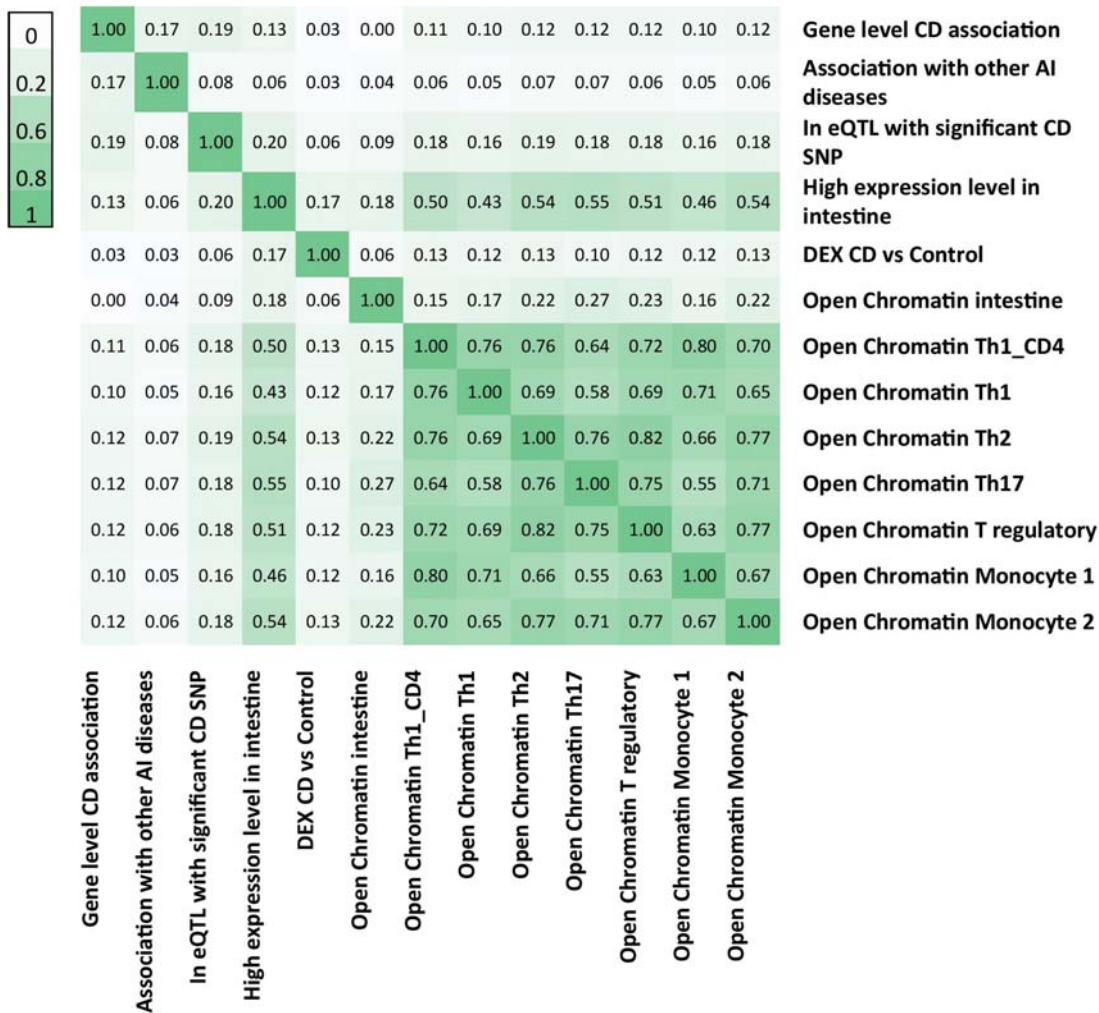

Supplementary Table S1. Enrichment of gene features among CD region genes and among CD reference genes.

| Gene feature                                   | Category (N)                                             | CD loci<br>(#gene = 1,328)             | non CD loci<br>(#gene = 23,134)        | log OR(95%CI)                      | p-value                | CD reference<br>(#gene = 54)        | non CD reference<br>(#gene = 24,408)    | log OR(95%CI)                    | p-value              |
|------------------------------------------------|----------------------------------------------------------|----------------------------------------|----------------------------------------|------------------------------------|------------------------|-------------------------------------|-----------------------------------------|----------------------------------|----------------------|
| <b>Gene level CD association</b>               | > 0.05 (22694)<br>(3E-6, 0.05] (1566)<br><=3E-6 (202)    | 745(56.1%)<br>421(31.7%)<br>162(12.2%) | 21949(94.9%)<br>1145(4.9%)<br>40(0.2%) | 2.38(2.25,2.52)<br>4.78(4.43,5.14) | 3.14E-268<br>9.70E-155 | 13(24.1%)<br>22(40.7%)<br>19(35.2%) | 22681(92.9%)<br>1544(6.3%)<br>183(0.7%) | 3.21(2.53,3.9)<br>5.2(4.48,5.92) | 5.22E-20<br>1.94E-45 |
| <b>Association with other AI diseases</b>      | None (23975)<br>In 1 study (337)<br>In >=2 studies (150) | 1196(90.1%)<br>70(5.3%)<br>62(4.7%)    | 22779(98.5%)<br>267(1.2%)<br>88(0.4%)  | 1.61(1.34,1.88)<br>2.6(2.27,2.93)  | 1.37E-31<br>1.28E-53   | 24(44.4%)<br>8(14.8%)<br>22(40.7%)  | 23951(98.1%)<br>329(1.3%)<br>128(0.5%)  | 3.19(2.38,4)<br>5.14(4.54,5.75)  | 9.89E-15<br>1.44E-62 |
| <b>In eQTL with significant CD SNP</b>         | No (21498)<br>Yes (2964)                                 | 1003(75.5%)<br>325(24.5%)              | 20495(88.6%)<br>2639(11.4%)            | 0.92(0.79,1.05)                    | 4.76E-43               | 29(53.7%)<br>25(46.3%)              | 21469(88%)<br>2939(12%)                 | 1.84(1.3,2.38)                   | 1.76E-11             |
| <b>High expression level in intestine</b>      | No (10858)<br>Yes (13604)                                | 43(32.5%)<br>897(67.5%)                | 10427(45.1%)<br>12707(54.9%)           | 0.54(0.42,0.65)                    | 5.20E-19               | 6(11.1%)<br>48(88.9%)               | 10852(44.5%)<br>13556(55.5%)            | 1.86(1.01,2.71)                  | 1.81E-05             |
| <b>Differential expression (CD vs Control)</b> | No (22220)<br>Yes (2242)                                 | 1182(89%)<br>146(11%)                  | 21038(90.9%)<br>2096(9.1%)             | 0.21(0.04,0.39)                    | 0.0177506              | 43(79.6%)<br>11(20.4%)              | 22177(90.9%)<br>2231(9.1%)              | 0.93(0.27,1.6)                   | 0.0058468            |
| <b>Open Chromatin Intestine</b>                | No (15061)<br>Yes (9401)                                 | 941(70.9%)<br>387(29.1%)               | 14120(61%)<br>9014(39%)                | -0.44(-0.56,-0.32)                 | 1.18E-12               | 27(50%)<br>27(50%)                  | 15034(61.6%)<br>9374(38.4%)             | 0.47(-0.06,1.01)                 | 0.0829909            |
| <b>Open Chromatin Th1CD4</b>                   | No (6901)<br>Yes (17561)                                 | 187(14.1%)<br>1141(85.9%)              | 6714(29%)<br>16420(71%)                | 0.91(0.76,1.07)                    | 4.28E-30               | 3(5.6%)<br>51(94.4%)                | 6898(28.3%)<br>17510(71.7%)             | 1.9(0.74,3.07)                   | 0.0013735            |
| <b>Open Chromatin Th1</b>                      | No (5205)<br>Yes (19257)                                 | 129(9.7%)<br>1199(90.3%)               | 5076(21.9%)<br>18058(78.1%)            | 0.96(0.78,1.14)                    | 1.69E-24               | 1(1.9%)<br>53(98.1%)                | 5204(21.3%)<br>19204(78.7%)             | 2.66(0.69,4.64)                  | 0.0083025            |
| <b>Open Chromatin Th2</b>                      | No (8582)<br>Yes (15880)                                 | 300(22.6%)<br>1028(77.4%)              | 8282(35.8%)<br>14852(64.2%)            | 0.65(0.52,0.78)                    | 4.49E-22               | 5(9.3%)<br>49(90.7%)                | 8577(35.1%)<br>15831(64.9%)             | 1.67(0.75,2.59)                  | 0.0003785            |
| <b>Open Chromatin Th17</b>                     | No (10195)<br>Yes (14267)                                | 383(28.8%)<br>945(71.2%)               | 9812(42.4%)<br>13322(57.6%)            | 0.6(0.48,0.72)                     | 5.87E-22               | 6(11.1%)<br>48(88.9%)               | 10189(41.7%)<br>14219(58.3%)            | 1.75(0.9,2.6)                    | 5.56E-05             |
| <b>Open Chromatin Tregulatory</b>              | No (7681)<br>Yes (16781)                                 | 259(19.5%)<br>1069(80.5%)              | 7422(32.1%)<br>15712(67.9%)            | 0.67(0.53,0.81)                    | 3.48E-21               | 2(3.7%)<br>52(96.3%)                | 7679(31.5%)<br>16729(68.5%)             | 2.48(1.07,3.89)                  | 0.0005764            |
| <b>Open Chromatin Monocyte 1</b>               | No (5917)<br>Yes (18545)                                 | 162(12.2%)<br>1166(87.8%)              | 5755(24.9%)<br>17379(75.1%)            | 0.87(0.7,1.04)                     | 2.15E-24               | 3(5.6%)<br>51(94.4%)                | 5914(24.2%)<br>18494(75.8%)             | 1.69(0.53,2.86)                  | 0.0043854            |
| <b>Open Chromatin Monocyte 2</b>               | No (8145)<br>Yes (16317)                                 | 243(18.3%)<br>1085(81.7%)              | 7902(34.2%)<br>15232(65.8%)            | 0.84(0.7,0.98)                     | 3.41E-31               | 3(5.6%)<br>51(94.4%)                | 8142(33.4%)<br>16266(66.6%)             | 2.14(0.98,3.31)                  | 0.000314             |

P-values and log odds ratios (log OR) are from a logistic regression model using single gene feature as the predictor.

Supplementary Table S2. Weights of gene features in the regression model.

|                                                               | <b>Weight</b> | <b>Std.Error</b> | <b>P-value</b> |
|---------------------------------------------------------------|---------------|------------------|----------------|
| <b>(Intercept)</b>                                            | -8.6082       | 0.5351           | <2e-16         |
| <b>Gene level CD association [0.05,3E-6)</b>                  | 2.3622        | 0.3828           | 6.77E-10       |
| <b>Gene level CD association &lt;=3E-6</b>                    | 3.6612        | 0.443            | <2e-16         |
| <b>Association with other AI diseases (In 1 study)</b>        | 2.0311        | 0.4469           | 5.50E-06       |
| <b>Association with other AI diseases (In &gt;=2 studies)</b> | 3.5127        | 0.3566           | <2e-16         |
| <b>High expression level in intestine</b>                     | 1.0446        | 0.4943           | 0.0346         |
| <b>In eQTL with significant CD SNP</b>                        | 0.3061        | 0.3225           | 0.3426         |
| <b>Differential expression between CD and Control</b>         | 0.313         | 0.3906           | 0.4229         |
| <b>Open Chromatin in Th17 cell</b>                            | 0.2081        | 0.4827           | 0.6663         |

Supplementary Table S3. Gene features and prioritization scores of human genes. Excel file available upon request.

Supplementary Table S4. Gene Ontology enrichment of genes ranked top 213 by integrative model.

| GO term    | Description                                                                                                                             | P-value  | FDR q-value | Enrichment (N, B, n, b)  |
|------------|-----------------------------------------------------------------------------------------------------------------------------------------|----------|-------------|--------------------------|
| GO:0002376 | immune system process                                                                                                                   | 2.43E-33 | 2.98E-29    | 4.37 (17117,1586,205,83) |
| GO:0002682 | regulation of immune system process                                                                                                     | 4.24E-30 | 2.6E-26     | 5.18 (17117,1063,205,66) |
| GO:0001817 | regulation of cytokine production                                                                                                       | 6.82E-27 | 2.78E-23    | 8.09 (17117,444,205,43)  |
| GO:0006955 | immune response                                                                                                                         | 8.4E-27  | 2.57E-23    | 5.10 (17117,982,205,60)  |
| GO:0019221 | cytokine-mediated signaling pathway                                                                                                     | 1.51E-26 | 3.7E-23     | 10.06 (17117,307,205,37) |
| GO:0050865 | regulation of cell activation                                                                                                           | 2.35E-26 | 4.8E-23     | 8.77 (17117,381,205,40)  |
| GO:0071345 | cellular response to cytokine stimulus                                                                                                  | 1.3E-25  | 2.28E-22    | 8.07 (17117,424,205,41)  |
| GO:0051249 | regulation of lymphocyte activation                                                                                                     | 2.56E-25 | 3.92E-22    | 9.73 (17117,309,205,36)  |
| GO:0034097 | response to cytokine                                                                                                                    | 2.9E-25  | 3.94E-22    | 7.13 (17117,515,205,44)  |
| GO:0071346 | cellular response to interferon-gamma                                                                                                   | 4.41E-25 | 5.4E-22     | 22.33 (17117,86,205,23)  |
| GO:0050776 | regulation of immune response                                                                                                           | 5.41E-25 | 6.01E-22    | 5.91 (17117,707,205,50)  |
| GO:0002694 | regulation of leukocyte activation                                                                                                      | 2.07E-24 | 2.11E-21    | 8.78 (17117,352,205,37)  |
| GO:0034341 | response to interferon-gamma                                                                                                            | 2.49E-24 | 2.35E-21    | 19.09 (17117,105,205,24) |
| GO:0060333 | interferon-gamma-mediated signaling pathway                                                                                             | 1.24E-23 | 1.08E-20    | 26.51 (17117,63,205,20)  |
| GO:0050863 | regulation of T cell activation                                                                                                         | 1.42E-23 | 1.16E-20    | 11.06 (17117,234,205,31) |
| GO:0002684 | positive regulation of immune system process                                                                                            | 4.32E-20 | 3.3E-17     | 5.60 (17117,626,205,42)  |
| GO:0031347 | regulation of defense response                                                                                                          | 8.46E-20 | 6.09E-17    | 6.46 (17117,478,205,37)  |
| GO:0050867 | positive regulation of cell activation                                                                                                  | 9.6E-20  | 6.52E-17    | 9.66 (17117,242,205,28)  |
| GO:0050670 | regulation of lymphocyte proliferation                                                                                                  | 6.54E-19 | 4.21E-16    | 12.47 (17117,154,205,23) |
| GO:0032944 | regulation of mononuclear cell proliferation                                                                                            | 7.6E-19  | 4.65E-16    | 12.39 (17117,155,205,23) |
| GO:0071310 | cellular response to organic substance                                                                                                  | 7.73E-19 | 4.51E-16    | 3.51 (17117,1453,205,61) |
| GO:0070663 | regulation of leukocyte proliferation                                                                                                   | 1.37E-18 | 7.63E-16    | 12.08 (17117,159,205,23) |
| GO:0002696 | positive regulation of leukocyte activation                                                                                             | 4.79E-18 | 2.55E-15    | 9.36 (17117,232,205,26)  |
| GO:0051251 | positive regulation of lymphocyte activation                                                                                            | 7.96E-18 | 4.06E-15    | 9.75 (17117,214,205,25)  |
| GO:0070887 | cellular response to chemical stimulus                                                                                                  | 8.41E-18 | 4.12E-15    | 3.16 (17117,1720,205,65) |
| GO:0002819 | regulation of adaptive immune response                                                                                                  | 1.97E-17 | 9.28E-15    | 15.11 (17117,105,205,19) |
| GO:0048583 | regulation of response to stimulus                                                                                                      | 3.76E-17 | 1.7E-14     | 2.57 (17117,2636,205,81) |
| GO:0050870 | positive regulation of T cell activation                                                                                                | 5.44E-17 | 2.38E-14    | 11.07 (17117,166,205,22) |
| GO:0002822 | regulation of adaptive immune response based on somatic recombination of immune receptors built from immunoglobulin superfamily domains | 7.29E-17 | 3.08E-14    | 15.66 (17117,96,205,18)  |
| GO:0051239 | regulation of multicellular organismal process                                                                                          | 9.13E-17 | 3.72E-14    | 2.94 (17117,1906,205,67) |
| GO:0048002 | antigen processing and presentation of peptide antigen                                                                                  | 1.51E-16 | 5.97E-14    | 10.56 (17117,174,205,22) |
| GO:0048518 | positive regulation of biological process                                                                                               | 1.62E-16 | 6.19E-14    | 2.17 (17117,3816,205,99) |
| GO:0010033 | response to organic substance                                                                                                           | 1.63E-16 | 6.05E-14    | 2.83 (17117,2033,205,69) |
| GO:0032649 | regulation of interferon-gamma production                                                                                               | 1.78E-16 | 6.41E-14    | 18.82 (17117,71,205,16)  |
| GO:0002683 | negative regulation of immune system process                                                                                            | 3.14E-16 | 1.1E-13     | 9.51 (17117,202,205,23)  |
| GO:0002478 | antigen processing and presentation of exogenous peptide antigen                                                                        | 4.56E-16 | 1.55E-13    | 10.82 (17117,162,205,21) |
| GO:0019882 | antigen processing and presentation                                                                                                     | 6.68E-16 | 2.21E-13    | 9.19 (17117,209,205,23)  |
| GO:0019884 | antigen processing and presentation of exogenous antigen                                                                                | 1.09E-15 | 3.52E-13    | 10.38 (17117,169,205,21) |
| GO:0006952 | defense response                                                                                                                        | 1.91E-15 | 5.99E-13    | 3.60 (17117,1138,205,49) |
| GO:0080134 | regulation of response to stress                                                                                                        | 2.3E-15  | 7.04E-13    | 4.15 (17117,846,205,42)  |
| GO:0001819 | positive regulation of cytokine production                                                                                              | 5.34E-15 | 1.59E-12    | 7.86 (17117,255,205,24)  |
| GO:0002706 | regulation of lymphocyte mediated immunity                                                                                              | 6.74E-15 | 1.96E-12    | 15.18 (17117,88,205,16)  |
| GO:0032101 | regulation of response to external stimulus                                                                                             | 9.5E-15  | 2.7E-12     | 5.12 (17117,538,205,33)  |
| GO:0002703 | regulation of leukocyte mediated immunity                                                                                               | 2.18E-14 | 6.06E-12    | 12.67 (17117,112,205,17) |
| GO:0002699 | positive regulation of immune effector process                                                                                          | 2.54E-14 | 6.9E-12     | 12.56 (17117,113,205,17) |
| GO:0042129 | regulation of T cell proliferation                                                                                                      | 2.54E-14 | 6.75E-12    | 12.56 (17117,113,205,17) |
| GO:0050778 | positive regulation of immune response                                                                                                  | 3.97E-14 | 1.03E-11    | 5.64 (17117,429,205,29)  |
| GO:1902105 | regulation of leukocyte differentiation                                                                                                 | 1.21E-13 | 3.09E-11    | 8.84 (17117,189,205,20)  |
| GO:0048584 | positive regulation of response to stimulus                                                                                             | 1.26E-13 | 3.16E-11    | 3.12 (17117,1365,205,51) |

Supplementary Table S5. Gene Ontology enrichment of genes ranked top 213 by GWAS-only model.

| GO term                    | Description                                         | P-value  | FDR q-value | Enrichment (N, B, n, b)  |
|----------------------------|-----------------------------------------------------|----------|-------------|--------------------------|
| <a href="#">GO:0002376</a> | immune system process                               | 6.01E-19 | 7.35E-15    | 3.37 (17117,1586,205,64) |
| <a href="#">GO:0006955</a> | immune response                                     | 1.75E-14 | 1.07E-10    | 3.74 (17117,982,205,44)  |
| <a href="#">GO:0001817</a> | regulation of cytokine production                   | 6.25E-13 | 2.55E-9     | 5.27 (17117,444,205,28)  |
| <a href="#">GO:0048583</a> | regulation of response to stimulus                  | 6.88E-13 | 2.1E-9      | 2.31 (17117,2636,205,73) |
| <a href="#">GO:0002682</a> | regulation of immune system process                 | 1.19E-12 | 2.92E-9     | 3.38 (17117,1063,205,43) |
| <a href="#">GO:0048584</a> | positive regulation of response to stimulus         | 3.14E-10 | 6.4E-7      | 2.75 (17117,1365,205,45) |
| <a href="#">GO:0050776</a> | regulation of immune response                       | 3.74E-10 | 6.54E-7     | 3.66 (17117,707,205,31)  |
| <a href="#">GO:0070887</a> | cellular response to chemical stimulus              | 6.61E-10 | 1.01E-6     | 2.48 (17117,1720,205,51) |
| <a href="#">GO:0002708</a> | positive regulation of lymphocyte mediated immunity | 7.37E-10 | 1E-6        | 15.46 (17117,54,205,10)  |
| <a href="#">GO:0002705</a> | positive regulation of leukocyte mediated immunity  | 1.07E-9  | 1.31E-6     | 14.91 (17117,56,205,10)  |
| <a href="#">GO:0032101</a> | regulation of response to external stimulus         | 1.5E-9   | 1.67E-6     | 4.04 (17117,538,205,26)  |
| <a href="#">GO:0006952</a> | defense response                                    | 2.07E-9  | 2.11E-6     | 2.86 (17117,1138,205,39) |
| <a href="#">GO:0031347</a> | regulation of defense response                      | 3.2E-9   | 3.01E-6     | 4.19 (17117,478,205,24)  |
| <a href="#">GO:0048518</a> | positive regulation of biological process           | 3.2E-9   | 2.8E-6      | 1.82 (17117,3816,205,83) |
| <a href="#">GO:0010033</a> | response to organic substance                       | 3.33E-9  | 2.72E-6     | 2.26 (17117,2033,205,55) |
| <a href="#">GO:0002819</a> | regulation of adaptive immune response              | 4.64E-9  | 3.55E-6     | 9.54 (17117,105,205,12)  |
| <a href="#">GO:0002706</a> | regulation of lymphocyte mediated immunity          | 7.95E-9  | 5.72E-6     | 10.44 (17117,88,205,11)  |

Supplementary Table S6. Effect of CD risk allele on gene expression based on eQTL information. Genes are categorized according to their differential expression in macrophage subsets.

| SNP CD association p-value < 0.01<br>eQTL p-value < 1E-5 |                                           | 24 hour              |                      | Chi-squared p-value<br>(down regulation by risk allele: genes<br>highly expressed in M1 vs. all other<br>genes) |         |
|----------------------------------------------------------|-------------------------------------------|----------------------|----------------------|-----------------------------------------------------------------------------------------------------------------|---------|
| CD_risk_allele_cause_decreased_expression                | CD_risk_allele_cause_increased_expression | more expressed in M2 | More expressed in M1 | Genes not showing high expression level in M1                                                                   |         |
| 39                                                       | 33                                        | 66                   | 31                   | 2026                                                                                                            | 0.01472 |
|                                                          |                                           |                      |                      | 1655                                                                                                            |         |

| SNP CD association p-value < 0.01<br>eQTL p-value < 1E-5 |                                           | 6 hour               |                      | Chi-squared p-value<br>(down regulation by risk allele: genes<br>highly expressed in M1 vs. all other<br>genes) |         |
|----------------------------------------------------------|-------------------------------------------|----------------------|----------------------|-----------------------------------------------------------------------------------------------------------------|---------|
| CD_risk_allele_cause_decreased_expression                | CD_risk_allele_cause_increased_expression | more expressed in M2 | More expressed in M1 | Genes not showing high expression level in M1                                                                   |         |
| 24                                                       | 22                                        | 59                   | 28                   | 2033                                                                                                            | 0.02426 |
|                                                          |                                           |                      |                      | 1658                                                                                                            |         |

Supplementary Table S7. Quality control of RNA-seq data showing the number of reads mapped for each sample and correlation between each sample and other samples obtained from the same tissue.

| Sample group | Phenotype      | Sample ID    | sequencing platform            | number all mapped reads | number non-PCR duplicate mapped reads | percentage non-PCR duplicate | median correlation with samples in same group (LPMC or Terminal ileal samples) | Comment |
|--------------|----------------|--------------|--------------------------------|-------------------------|---------------------------------------|------------------------------|--------------------------------------------------------------------------------|---------|
| Body Map     | Brain          | ERR030882    | HiSeq 2000; paired end; 2/lane | 144597292               | 27770888                              | 0.192056764                  |                                                                                |         |
| Body Map     | Breast         | ERR030883    | HiSeq 2000; paired end; 2/lane | 149270686               | 19660870                              | 0.131712867                  |                                                                                |         |
| Body Map     | Adrenal        | ERR030881    | HiSeq 2000; paired end; 2/lane | 149835249               | 25254748                              | 0.168550112                  |                                                                                |         |
| Body Map     | Adipose        | ERR030880    | HiSeq 2000; paired end; 2/lane | 152035153               | 17811406                              | 0.117153209                  |                                                                                |         |
| Body Map     | Lung           | ERR030879    | HiSeq 2000; paired end; 2/lane | 155825625               | 12560122                              | 0.0806037                    |                                                                                |         |
| Body Map     | Kidney         | ERR030885    | HiSeq 2000; paired end; 2/lane | 158704536               | 16404525                              | 0.103365193                  |                                                                                |         |
| Body Map     | WhiteBloodCell | ERR030875    | HiSeq 2000; paired end; 2/lane | 160622580               | 10669866                              | 0.066428182                  |                                                                                |         |
| Body Map     | SkeletalMuscle | ERR030876    | HiSeq 2000; paired end; 2/lane | 161171838               | 7282803                               | 0.045186573                  |                                                                                |         |
| Body Map     | Thyroid        | ERR030872    | HiSeq 2000; paired end; 2/lane | 162512970               | 23470025                              | 0.144419396                  |                                                                                |         |
| Body Map     | Ovary          | ERR030874    | HiSeq 2000; paired end; 2/lane | 163083358               | 29927602                              | 0.183511073                  |                                                                                |         |
| Body Map     | Prostate       | ERR030877    | HiSeq 2000; paired end; 2/lane | 163491044               | 15627932                              | 0.095588918                  |                                                                                |         |
| Body Map     | Colon          | ERR030884    | HiSeq 2000; paired end; 2/lane | 165199634               | 13424423                              | 0.08126182                   |                                                                                |         |
| Body Map     | Liver          | ERR030887    | HiSeq 2000; paired end; 2/lane | 163589427               | 12163145                              | 0.074351657                  |                                                                                |         |
| Body Map     | Testes         | ERR030873    | HiSeq 2000; paired end; 2/lane | 164149821               | 24594842                              | 0.149831671                  |                                                                                |         |
| Body Map     | LymphNode      | ERR030878    | HiSeq 2000; paired end; 2/lane | 165421737               | 11575677                              | 0.069976759                  |                                                                                |         |
| Body Map     | Heart          | ERR030886    | HiSeq 2000; paired end; 2/lane | 169651392               | 21317897                              | 0.125657071                  |                                                                                |         |
| Brain        | Brain          | brain HSB130 | GAIIX; single end; 1/lane      | 23030378                | 6322345                               | 0.274521981                  |                                                                                |         |
| Brain        | Brain          | brain HSB126 | GAIIX; single end; 1/lane      | 25035136                | 9675488                               | 0.386476351                  |                                                                                |         |
| Brain        | Brain          | brain HSB145 | GAIIX; single end; 1/lane      | 27313443                | 12312672                              | 0.450791649                  |                                                                                |         |
| Brain        | Brain          | brain HSB123 | GAIIX; single end; 1/lane      | 29170186                | 13144234                              | 0.45060508                   |                                                                                |         |
| LPMC         | CD             | mRNA C1086   | HiSeq 2000; paired end; 1/lane | 127997897               | 31495369                              | 0.246061613                  | 0.908                                                                          |         |
| LPMC         | Control        | mRNA C1080   | HiSeq 2000; paired end; 1/lane | 160648987               | 31164430                              | 0.193990828                  | 0.935                                                                          |         |
| LPMC         | Control        | mRNA C1081   | HiSeq 2000; paired end; 1/lane | 166158711               | 9677412                               | 0.058241978                  | 0.93                                                                           |         |

|                        |         |            |                                             |           |          |             |       |          |
|------------------------|---------|------------|---------------------------------------------|-----------|----------|-------------|-------|----------|
| LPMC                   | CD      | mRNA C1063 | 1/lane<br>HiSeq 2000; paired end;<br>1/lane | 386174706 | 16235078 | 0.04204076  | 0.932 |          |
| LPMC                   | Control | mRNA C1070 | 1/lane<br>HiSeq 2000; paired end;<br>1/lane | 388378161 | 18992423 | 0.048901882 | 0.928 |          |
| LPMC                   | CD      | mRNA C1055 | 1/lane<br>HiSeq 2000; paired end;<br>1/lane | 409455084 | 10038159 | 0.024515898 | 0.94  |          |
| Terminal ileum<br>RISK | CD      | J1-0002    | HiSeq; single end; 12/lane                  | 4020413   | 1892509  | 0.470725023 | 0.734 | excluded |
| Terminal ileum<br>RISK | CD      | J1-0001    | HiSeq; single end; 12/lane                  | 5067684   | 1877716  | 0.370527444 | 0.846 | excluded |
| Terminal ileum<br>RISK | CD      | J1-0007    | HiSeq; single end; 12/lane                  | 6879094   | 2720321  | 0.395447569 | 0.883 | excluded |
| Terminal ileum<br>RISK | CD      | J1-0033    | HiSeq; single end; 12/lane                  | 9791093   | 3588245  | 0.366480535 | 0.894 | excluded |
| Terminal ileum<br>RISK | CD      | J1-0005    | HiSeq; single end; 12/lane                  | 14404539  | 789469   | 0.054806961 | 0.755 | excluded |
| Terminal ileum<br>RISK | Control | J1-0003    | HiSeq; single end; 12/lane                  | 10015865  | 3674859  | 0.366903807 | 0.916 |          |
| Terminal ileum<br>RISK | Control | J1-0006    | HiSeq; single end; 12/lane                  | 12043698  | 3903584  | 0.32411839  | 0.917 |          |
| Terminal ileum<br>RISK | CD      | J1-0004    | HiSeq; single end; 12/lane                  | 12649207  | 6349694  | 0.501983563 | 0.954 |          |
| Terminal ileum<br>RISK | CD      | J1-0019    | HiSeq; single end; 12/lane                  | 13494731  | 7468961  | 0.553472389 | 0.914 |          |
| Terminal ileum<br>RISK | Control | J1-0012    | HiSeq; single end; 12/lane                  | 13903102  | 6613990  | 0.475720454 | 0.95  |          |
| Terminal ileum<br>RISK | Control | J1-0008    | HiSeq; single end; 12/lane                  | 13953919  | 6724103  | 0.481879177 | 0.951 |          |
| Terminal ileum<br>RISK | Control | J1-0011    | HiSeq; single end; 12/lane                  | 14106709  | 6853101  | 0.485804379 | 0.953 |          |
| Terminal ileum<br>RISK | CD      | J1-0009    | HiSeq; single end; 12/lane                  | 15152683  | 6820545  | 0.450121276 | 0.939 |          |
| Terminal ileum<br>RISK | Control | J1-0013    | HiSeq; single end; 12/lane                  | 15295746  | 8214396  | 0.537037945 | 0.961 |          |
| Terminal ileum<br>RISK | CD      | J1-0016    | HiSeq; single end; 12/lane                  | 15331812  | 7197167  | 0.469427032 | 0.942 |          |
| Terminal ileum<br>RISK | Control | J1-0015    | HiSeq; single end; 12/lane                  | 15387993  | 7568296  | 0.491831261 | 0.951 |          |
| Terminal ileum<br>RISK | Control | J1-0034    | HiSeq; single end; 12/lane                  | 15406183  | 7611892  | 0.494080331 | 0.905 |          |
| Terminal ileum<br>RISK | Control | J1-0017    | HiSeq; single end; 12/lane                  | 15494899  | 8516733  | 0.549647532 | 0.957 |          |
| Terminal ileum<br>RISK | Control | J1-0010    | HiSeq; single end; 12/lane                  | 15832105  | 5589446  | 0.353045031 | 0.942 |          |
| Terminal ileum<br>RISK | Control | J1-0020    | HiSeq; single end; 12/lane                  | 16023759  | 8033112  | 0.501325064 | 0.956 |          |
| Terminal ileum<br>RISK | Control | J1-0021    | HiSeq; single end; 12/lane                  | 16624694  | 6334337  | 0.381019765 | 0.943 |          |
| Terminal ileum         | CD      | J1-0014    | HiSeq; single end; 12/lane                  | 16699323  | 8361792  | 0.500726407 | 0.953 |          |



| RISK                |         |         |                            |          |          |             |       |
|---------------------|---------|---------|----------------------------|----------|----------|-------------|-------|
| Terminal ileum RISK | CD      | J1-0018 | HiSeq; single end; 12/lane | 16755491 | 7463374  | 0.445428546 | 0.955 |
| Terminal ileum RISK | CD      | J1-0026 | HiSeq; single end; 12/lane | 17263319 | 8919830  | 0.516692648 | 0.957 |
| Terminal ileum RISK | Control | J1-0023 | HiSeq; single end; 12/lane | 17456274 | 8336624  | 0.477571789 | 0.953 |
| Terminal ileum RISK | Control | J1-0042 | HiSeq; single end; 12/lane | 17567585 | 8756429  | 0.498442387 | 0.932 |
| Terminal ileum RISK | Control | J1-0027 | HiSeq; single end; 12/lane | 18155578 | 10048344 | 0.553457676 | 0.946 |
| Terminal ileum RISK | Control | J1-0029 | HiSeq; single end; 12/lane | 18435432 | 6663730  | 0.361463187 | 0.948 |
| Terminal ileum RISK | Control | J1-0031 | HiSeq; single end; 12/lane | 18577527 | 8865190  | 0.477199683 | 0.96  |
| Terminal ileum RISK | CD      | J1-0022 | HiSeq; single end; 12/lane | 18661334 | 8417370  | 0.451059394 | 0.952 |
| Terminal ileum RISK | CD      | J1-0025 | HiSeq; single end; 12/lane | 18675523 | 8230613  | 0.4407166   | 0.949 |
| Terminal ileum RISK | Control | J1-0024 | HiSeq; single end; 12/lane | 18691550 | 9496484  | 0.508062948 | 0.947 |
| Terminal ileum RISK | Control | J1-0028 | HiSeq; single end; 12/lane | 19074152 | 9536868  | 0.499989095 | 0.944 |
| Terminal ileum RISK | CD      | J1-0035 | HiSeq; single end; 12/lane | 19135665 | 9413868  | 0.491954055 | 0.962 |
| Terminal ileum RISK | CD      | J1-0030 | HiSeq; single end; 12/lane | 19192420 | 9681968  | 0.504468327 | 0.961 |
| Terminal ileum RISK | Control | J1-0037 | HiSeq; single end; 12/lane | 19442257 | 5523461  | 0.284095669 | 0.921 |
| Terminal ileum RISK | CD      | J1-0032 | HiSeq; single end; 12/lane | 19880586 | 8869453  | 0.446136397 | 0.951 |
| Terminal ileum RISK | CD      | J1-0036 | HiSeq; single end; 12/lane | 19959510 | 9704702  | 0.486219451 | 0.953 |
| Terminal ileum RISK | CD      | J1-0038 | HiSeq; single end; 12/lane | 20313233 | 9545947  | 0.469937356 | 0.961 |
| Terminal ileum RISK | Control | J1-0041 | HiSeq; single end; 12/lane | 20561815 | 9564285  | 0.465147897 | 0.949 |
| Terminal ileum RISK | Control | J1-0043 | HiSeq; single end; 12/lane | 20681616 | 9718008  | 0.469886299 | 0.962 |
| Terminal ileum RISK | CD      | J1-0039 | HiSeq; single end; 12/lane | 20737766 | 9443569  | 0.455380247 | 0.935 |
| Terminal ileum RISK | Control | J1-0044 | HiSeq; single end; 12/lane | 20836137 | 9915975  | 0.475902755 | 0.944 |
| Terminal ileum RISK | Control | J1-0040 | HiSeq; single end; 12/lane | 21179103 | 9931171  | 0.468913674 | 0.957 |
| Terminal ileum RISK | CD      | J1-0046 | HiSeq; single end; 12/lane | 21631343 | 8104513  | 0.374665272 | 0.956 |
| Terminal ileum RISK | Control | J1-0045 | HiSeq; single end; 12/lane | 22917810 | 10360767 | 0.452083641 | 0.961 |
| Terminal ileum RISK | CD      | J1-0048 | HiSeq; single end; 12/lane | 23614763 | 11697480 | 0.495346068 | 0.952 |

| RISK                |         |                |                            |          |          |             |       |          |
|---------------------|---------|----------------|----------------------------|----------|----------|-------------|-------|----------|
| Terminal ileum RISK | CD      | J1-0047        | HiSeq; single end; 12/lane | 23718059 | 11623811 | 0.490082726 | 0.957 |          |
| Terminal ileum RISK | CD      | J1-0049        | HiSeq; single end; 12/lane | 24267100 | 9673994  | 0.39864648  | 0.931 |          |
| Terminal ileum RISK | CD      | J1-0050        | HiSeq; single end; 12/lane | 31918201 | 11412767 | 0.357562978 | 0.93  |          |
| Terminal ileum Yale | CD      | Sample wz86-8  | HiSeq; paired end; 6/lane  | 55540246 | 18404738 | 0.331376602 | 0.869 | excluded |
| Terminal ileum Yale | CD      | Sample wz86-3  | HiSeq; paired end; 6/lane  | 56299734 | 6136117  | 0.10899016  | 0.888 | excluded |
| Terminal ileum Yale | CD      | Sample wz86-9  | HiSeq; paired end; 6/lane  | 45884054 | 20807702 | 0.453484385 | 0.967 |          |
| Terminal ileum Yale | Control | Sample wz86-15 | HiSeq; paired end; 6/lane  | 47108022 | 18598003 | 0.394794819 | 0.959 |          |
| Terminal ileum Yale | CD      | Sample wz86-6  | HiSeq; paired end; 6/lane  | 59451774 | 21960895 | 0.369390071 | 0.951 |          |
| Terminal ileum Yale | CD      | Sample wz86-7  | HiSeq; paired end; 6/lane  | 61708239 | 19533621 | 0.316548022 | 0.951 |          |
| Terminal ileum Yale | CD      | Sample wz86-2  | HiSeq; paired end; 6/lane  | 63841092 | 20741208 | 0.324888052 | 0.942 |          |
| Terminal ileum Yale | Control | Sample wz86-18 | HiSeq; paired end; 6/lane  | 64198414 | 25726617 | 0.400736021 | 0.962 |          |
| Terminal ileum Yale | CD      | Sample wz86-1  | HiSeq; paired end; 6/lane  | 68832309 | 22149862 | 0.321794551 | 0.959 |          |
| Terminal ileum Yale | CD      | Sample wz86-4  | HiSeq; paired end; 6/lane  | 69181608 | 16286343 | 0.235414346 | 0.941 |          |
| Terminal ileum Yale | Control | Sample wz86-17 | HiSeq; paired end; 6/lane  | 71059983 | 28386087 | 0.399466561 | 0.964 |          |
| Terminal ileum Yale | Control | Sample wz86-19 | HiSeq; paired end; 6/lane  | 71645077 | 28056132 | 0.391598881 | 0.961 |          |
| Terminal ileum Yale | CD      | Sample wz86-10 | HiSeq; paired end; 6/lane  | 75708466 | 29754105 | 0.393008954 | 0.964 |          |
| Terminal ileum Yale | CD      | Sample wz86-5  | HiSeq; paired end; 6/lane  | 76129286 | 26730838 | 0.351124244 | 0.965 |          |
| Terminal ileum Yale | Control | Sample wz86-16 | HiSeq; paired end; 6/lane  | 80399063 | 28455989 | 0.353934336 | 0.96  |          |

Supplementary Table S8. List of CD reference genes.

| <b>geneID</b>  | <b>Source</b>                                                               | <b>PubMed</b>                |
|----------------|-----------------------------------------------------------------------------|------------------------------|
| <b>ADAM17</b>  | Mendelian form of CD                                                        | 22010916                     |
| <b>ATG16L1</b> | ImmunoChip                                                                  | 23128233                     |
| <b>CARD9</b>   | ImmunoChip; Excess of rare variants in cases or controls                    | 23128233; 21983784           |
| <b>CCR6</b>    | Modified intestinal pathology in in two mouse knockout experiments          | 23047555; 14515278           |
| <b>CD226</b>   | ImmunoChip                                                                  | 23128233                     |
| <b>CD40</b>    | ImmunoChip                                                                  | 23128233                     |
| <b>CD48</b>    | ImmunoChip                                                                  | 23128233                     |
| <b>CD6</b>     | ImmunoChip                                                                  | 23128233                     |
| <b>CEBPB</b>   | ImmunoChip                                                                  | 23128233                     |
| <b>CREM</b>    | ImmunoChip                                                                  | 23128233                     |
| <b>CRTC3</b>   | ImmunoChip                                                                  | 23128233                     |
| <b>CXCL5</b>   | ImmunoChip                                                                  | 23128233                     |
| <b>CXCR5</b>   | ImmunoChip                                                                  | 23128233                     |
| <b>DAP</b>     | ImmunoChip                                                                  | 23128233                     |
| <b>DOK3</b>    | ImmunoChip                                                                  | 23128233                     |
| <b>EPO</b>     | ImmunoChip                                                                  | 23128233                     |
| <b>FOS</b>     | ImmunoChip                                                                  | 23128233                     |
| <b>FUT2</b>    | ImmunoChip; Mutation linked to differences in intestinal microbes           | 23128233; 23047555; 22068912 |
| <b>GPR35</b>   | ImmunoChip                                                                  | 23128233                     |
| <b>GPR65</b>   | ImmunoChip                                                                  | 23128233                     |
| <b>ICOSLG</b>  | ImmunoChip                                                                  | 23128233                     |
| <b>IFIH1</b>   | Excess of rare variants in cases or controls                                | 21983784                     |
| <b>IL10</b>    | ImmunoChip                                                                  | 23128233                     |
| <b>IL10RA</b>  | Mendelian form of CD                                                        | 19890111;24216686            |
| <b>IL10RB</b>  | Mendelian form of CD                                                        | 19890111;24216686            |
| <b>IL12B</b>   | ImmunoChip                                                                  | 23128233                     |
| <b>IL18RAP</b> | Excess of rare variants in cases or controls                                | 21983784                     |
| <b>IL23R</b>   | ImmunoChip                                                                  | 23128233                     |
| <b>IRF8</b>    | ImmunoChip                                                                  | 23128233                     |
| <b>IRGM</b>    | ImmunoChip; Expression level linked with autophagy of internalized bacteria | 23128233; 19165925           |
| <b>IFNG</b>    | ImmunoChip                                                                  | 23128233                     |
| <b>JAK2</b>    | ImmunoChip                                                                  | 23128233                     |
| <b>LACC1</b>   | ImmunoChip                                                                  | 23128233                     |
| <b>MAP3K8</b>  | ImmunoChip                                                                  | 23128233                     |
| <b>NKX2-3</b>  | ImmunoChip                                                                  | 23128233                     |
| <b>NOD2</b>    | ImmunoChip                                                                  | 23128233                     |

|                 |                                                                                                                                   |                    |
|-----------------|-----------------------------------------------------------------------------------------------------------------------------------|--------------------|
| <b>PRKCB</b>    | ImmunoChip                                                                                                                        | 23128233           |
| <b>PTGER4</b>   | ImmunoChip                                                                                                                        | 23128233           |
| <b>PTPN22</b>   | ImmunoChip                                                                                                                        | 23128233           |
| <b>RASGRP1</b>  | ImmunoChip                                                                                                                        | 23128233           |
| <b>REL</b>      | ImmunoChip                                                                                                                        | 23128233           |
| <b>RIPK2</b>    | ImmunoChip                                                                                                                        | 23128233           |
| <b>RORC</b>     | ImmunoChip                                                                                                                        | 23128233           |
| <b>SMAD3</b>    | ImmunoChip                                                                                                                        | 23128233           |
| <b>SOCS1</b>    | ImmunoChip                                                                                                                        | 23128233           |
| <b>SPRED2</b>   | ImmunoChip                                                                                                                        | 23128233           |
| <b>STAT3</b>    | ImmunoChip                                                                                                                        | 23128233           |
| <b>TAGAP</b>    | ImmunoChip                                                                                                                        | 23128233           |
| <b>TNFAIP3</b>  | ImmunoChip                                                                                                                        | 23128233           |
| <b>TNFSF15</b>  | ImmunoChip                                                                                                                        | 23128233           |
| <b>TRAF3IP2</b> | ImmunoChip                                                                                                                        | 23128233           |
| <b>TYK2</b>     | ImmunoChip                                                                                                                        | 23128233           |
| <b>UBE2L3</b>   | ImmunoChip;                                                                                                                       | 23128233           |
| <b>ZNF365</b>   | Fine mapping and conditional analysis identified a single nonsynonymous SNP linked to expression of multiple genes in CD patients | 23047555; 21257989 |
